# Supplementary material
Source: publisher figshare collection journal article supplement (https://tandf.figshare.com/ndownloader/files/28819615)
Supplement: Supplementary file 1 [file 28819615]

**Map design for:** Leigh et al., 2021, Glacial and periglacial geomorphological map of central Troms and Finnmark county, Arctic Norway. Sumbitted to Journal of Maps, February 2021

The map accompanying the aforementioned manuscript was designed and created by the lead author Leigh, J. R. The design of the map follows the methods/designs of Evans et al. (2017a, 2017b, 201) which were employed for the mapping of “landforms” (e.g., moraine ridges, flutings, pronival ramparts) within Icelandic glaciated landsystems. The use of polygons was used to delineate the extent of features such as glaciers, moraines, rock glaciers etc. and the use of polylines was used to represent simple features such as moraine crests, flutings, glacial lineations etc. Polygons were filled with different block colour relative to the feature mapped (e.g. black, light brown etc.) to enable clear differentiation between features without adding complexity, Polylines were solid and coloured according to feature class. A semi-transparent DEM was used as a base map for the land area (to provide greater geographical/geomorphological context) and a simple fill was used to denote the fjords/oceans. Gridlines where not include within the map frame to avoid overcomplicating the map/obscuring mapped features, but grid markers are shown around the edges.
